# Supplementary material
Source: publisher site journal article supplement (https://www.spandidos-publications.com/6016/downloadSupplementary)
Supplement: Supplementary file 1 [file downloadSupplementary]

Table SI. Primer sequences used for circRNA.

| circRNA          | Primer  | Sequence (5'-3')        | Gene name | Length, bp | Best transcript <sup>a</sup> | Position                 | Strand |
|------------------|---------|-------------------------|-----------|------------|------------------------------|--------------------------|--------|
| hsa_circ_0006137 | Forward | TTGTGCTGTGACGGGTAGAC    | BAZ1A     | 145        | NM_013448                    | chr14:35331249-35331528  | -      |
|                  | Reverse | TAAGCGCGAACGATGGGTAA    |           |            |                              |                          |        |
| hsa_circ_0079422 | Forward | AGGCCCTCTGCTTTTCTTCC    | ICA1      | 120        | NM_004968                    | chr7:8257934-8275635     | -      |
|                  | Reverse | GGTTCACCGTCAGCCAAGTA    |           |            |                              |                          |        |
| hsa_circ_0007375 | Forward | TGGCGGAATACAGCAAGACA    | FBXL13    | 116        | NM_145032                    | chr7:102665509-102669865 | -      |
|                  | Reverse | TCTGCAGCAGCTCTTTTGAGT   |           |            |                              |                          |        |
| hsa_circ_0005597 | Forward | GTGGGGACTGCAAAGCAAAG    | PITPNB    | 232        | NM_012399                    | chr22:28249524-28256229  | -      |
|                  | Reverse | CTGACCCTACAGGGGACTCA    |           |            |                              |                          |        |
| hsa_circ_0006961 | Forward | AGAGGCGTCCTTAGCAGAGA    | BRAF      | 179        | NM_004333                    | chr7:140494107-140508795 | -      |
|                  | Reverse | ATCGGTCTCGTTGCCCAAAT    |           |            |                              |                          |        |
| hsa_circ_0004305 | Forward | TGTGGTGGTGATCTGAGTCTTG  | TTN-AS1   | 334        | NR_038272                    | chr2:179400458-179407088 | +      |
|                  | Reverse | GTCACACCAAAAACACCATTGAG |           |            |                              |                          |        |
| hsa_circ_0002775 | Forward | CCTGCTGCTCCACCTACAAA    | GPBP1     | 224        | NM_022913                    | chr5:56542126-56545403   | +      |
|                  | Reverse | TTGGTTAGACGAGGCTGCTG    |           |            |                              |                          |        |
| hsa_circ_0009096 | Forward | TCCTGTCAGCGGGAATTGAC    | UTRN      | 131        | NM_007124                    | chr6:144772505-144780490 | +      |
|                  | Reverse | AGAAAGCTATCGAAGCCCCG    |           |            |                              |                          |        |
| hsa_circ_0085616 | Forward | AGAAATGGATGCCGACCAG     | ASAP1     | 73         | NM_001247996                 | chr8:131370262-131374017 | -      |
|                  | Reverse | GTGGGCGAGTTGTAGTCCTC    |           |            |                              |                          |        |
| hsa_circ_0026229 | Forward | ACAGTATGCCTCCCCAGTCT    | LARP4     | 136        | NM_052879                    | chr12:50821544-50848200  | +      |
|                  | Reverse | ATTGGGAAAGGGAGCCAGTG    |           |            |                              |                          |        |
| hsa_circ_0005654 | Forward | ACCCACTCTGAGGAGAGACC    | PRDM5     | 126        | NM_018699                    | chr4:121675707-121732604 | -      |
|                  | Reverse | ATCGCAGTGATGGCACTTGA    |           |            |                              |                          |        |
| hsa_circ_0004692 | Forward | CTCTTCTGCCTATGAGCGGG    | SETD2     | 302        | NM_014159                    | chr3:47079155-47108608   | -      |
|                  | Reverse | CAGCATTAGGGTTGCTGGGA    |           |            |                              |                          |        |
| hsa_circ_0023936 | Forward | ATCCACAGTTGGCAGACAG     | PICALM    | 297        | NM_007166                    | chr11:85718584-85742653  | -      |
|                  | Reverse | TCCATCAGCCCCTCTCTTCA    |           |            |                              |                          |        |
| hsa_circ_0004383 | Forward | GACACTGGTGCAGGTAGCTC    | ZNF292    | 115        | NM_015021                    | chr6:87920168-87928449   | +      |
|                  | Reverse | AGTGCACAGTACCGGGTTTT    |           |            |                              |                          |        |
| hsa_circ_0002822 | Forward | ACGAGCCAGTGCATGAAAGA    | C2orf67   | 333        | NM_152519                    | chr2:210993754-211019335 | -      |
|                  | Reverse | ATGCTTTGCCAGGAGCATCT    |           |            |                              |                          |        |
| hsa_circ_0008777 | Forward | TCTTCCCAGCGCATTCTTT     | AURKA     | 91         | NM_198433                    | chr20:54956488-54961589  | -      |
|                  | Reverse | TGGTTGCCTGCAATTGCTTC    |           |            |                              |                          |        |
| hsa_circ_0081171 | Forward | ACCTTTGAGACTGCAAGGCA    | SGCE      | 151        | NM_001099401                 | chr7:94248069-94259153   | -      |
|                  | Reverse | TCACTGCGCCAAGAAAGTCT    |           |            |                              |                          |        |
| hsa_circ_0084665 | Forward | AGAGGAGGACAGATACCGACA   | CSPP1     | 132        | NM_024790                    | chr8:68007527-68007967   | +      |
|                  | Reverse | GGAATGCCAGCCTTGCTTG     |           |            |                              |                          |        |
| hsa_circ_0075828 | Forward | CTGCATTACTGCTCAACCACA   | LINC00340 | 89         | NR_015410                    | chr6:22020567-22020771   | +      |
|                  | Reverse | CCCAGGGATGACTTGGTGAC    |           |            |                              |                          |        |
| hsa_circ_0000374 | Forward | GAGATGGGTGTCGTGAGCTG    | ITFG2     | 103        | NM_018463                    | chr12:2929251-2930958    | +      |
|                  | Reverse | AGCTGCCCTGTCAGATGTTT    |           |            |                              |                          |        |
| hsa_circ_0006460 | Forward | AGACGGGACTCGAGTGATGA    | BRAF      | 158        | NM_004333                    | chr7:140476711-140494267 | -      |
|                  | Reverse | AACTGCTGAGGTGTAGGTGC    |           |            |                              |                          |        |

|                  |         |                       |         |     |              |                          |   |
|------------------|---------|-----------------------|---------|-----|--------------|--------------------------|---|
| hsa_circ_0005934 | Forward | TGGCAGATTTTGGAGTGGCT  | STK3    | 123 | NM_006281    | chr8:99718694-99735197   | - |
|                  | Reverse | CGGCCACACAGTTATAGCCT  |         |     |              |                          |   |
| hsa_circ_0001747 | Forward | AAAGCTCGAAAGGCCTGCTA  | MKLN1   | 240 | NM_013255    | chr7:131071878-131084192 | + |
|                  | Reverse | CCCCAGGACAAGAGTGGAAC  |         |     |              |                          |   |
| hsa_circ_0054345 | Forward | GGTGACTGGCAAAGAGCTGA  | LRPPRC  | 188 | NM_133259    | chr2:44139570-44145537   | - |
|                  | Reverse | GTGGTTGAGGCTGACGAAGA  |         |     |              |                          |   |
| hsa_circ_0067991 | Forward | AACAGAGCGACGAGCAAGAA  | FNDC3B  | 385 | NM_022763    | chr3:171969049-172025291 | + |
|                  | Reverse | GGTGGTGAAGCTAACAGGCT  |         |     |              |                          |   |
| hsa_circ_0005047 | Forward | TTGATTCCTCGTGCCAGACC  | CREB3L2 | 332 | NM_194071    | chr7:137586099-137600758 | - |
|                  | Reverse | AGCGATCAGGGTCTCTTCT   |         |     |              |                          |   |
| hsa_circ_0008177 | Forward | ACCCCTTGGAAGAGGACTGT  | FAM13B  | 269 | NM_016603    | chr5:137288316-137290065 | - |
|                  | Reverse | ATCACTGTAGGAGGGCTTGC  |         |     |              |                          |   |
| hsa_circ_0003526 | Forward | TTCCGGCAGATTTTGGCTCT  | SPG21   | 168 | NM_016630    | chr15:65266939-65275931  | - |
|                  | Reverse | GGCCAAAAGCCTCCCAAAG   |         |     |              |                          |   |
| hsa_circ_0056744 | Forward | AAGCCCGTGAACGTGAAAGA  | PRPF40A | 96  | NM_017892    | chr2:153519116-153525784 | - |
|                  | Reverse | TCGGAGGAGCAGCTTGTTTT  |         |     |              |                          |   |
| hsa_circ_0008523 | Forward | TAATTGCACAGGCACGGACA  | DDX21   | 89  | NM_004728    | chr10:70723046-70726959  | + |
|                  | Reverse | CCTGTCTTGCAGTTCCCAT   |         |     |              |                          |   |
| hsa_circ_0002338 | Forward | ACACATCTTCCCATGGCAG   | ALAS1   | 429 | NM_000688    | chr3:52238708-52240767   | + |
|                  | Reverse | TGCAGCAGTTCTCTGAGGTG  |         |     |              |                          |   |
| hsa_circ_0088088 | Forward | GGCTGGCAGGATGTACAGTT  | HSDL2   | 375 | NM_032303    | chr9:115166274-115171301 | + |
|                  | Reverse | CAAGGTAGGTGCCTCTGGTG  |         |     |              |                          |   |
| hsa_circ_0008932 | Forward | GAGGGTCTGCGTGAAATCCA  | LRP6    | 512 | NM_002336    | chr12:12332743-12340053  | - |
|                  | Reverse | CGATCAGTGCCAGTGTCTGT  |         |     |              |                          |   |
| hsa_circ_0001383 | Forward | TCTCCAGCCAGATACTCCCC  | DLG1    | 97  | NM_001204387 | chr3:196842797-196846401 | - |
|                  | Reverse | CCGTTGAGCCACGATGAAGA  |         |     |              |                          |   |
| hsa_circ_0002485 | Forward | ACCAGCTGGAGGATGAGTCT  | ATP9B   | 238 | NM_198531    | chr18:76856475-76886375  | + |
|                  | Reverse | AGCCATACTGTGCGAGCTTT  |         |     |              |                          |   |
| hsa_circ_0055019 | Forward | GTCAGCTGCGAATCAAACCG  | APLF    | 296 | NM_173545    | chr2:68717321-68753374   | + |
|                  | Reverse | TCCTTCCAGTTGTGAGGCAC  |         |     |              |                          |   |
| hsa_circ_0061286 | Forward | CAGGGCATTGAGGAGACTG   | USP25   | 164 | NM_013396    | chr21:17150222-17177577  | + |
|                  | Reverse | CGGGAGCTTTGTCTGTCTT   |         |     |              |                          |   |
| hsa_circ_0003113 | Forward | TGCAACTCCTATCACCAGCTC | RYK     | 720 | NM_001005861 | chr3:133876964-133914026 | - |
|                  | Reverse | AAGGCCACACATCACTAGC   |         |     |              |                          |   |
| hsa_circ_0000690 | Forward | CATCATCACGGATGGGGAGG  | ITGAL   | 123 | NM_001114380 | chr16:30495147-30495584  | + |
|                  | Reverse | TTGTGGAGGGTCTCCTGACT  |         |     |              |                          |   |
| hsa_circ_0004173 | Forward | TGCTGCTGAAATCCTTGGGA  | RAB28   | 401 | NM_004249    | chr4:13338516-13383218   | - |
|                  | Reverse | CCTGCCACTGTGAGGCAATA  |         |     |              |                          |   |
| hsa_circ_0070942 | Forward | CTGGAGGAGATCGAACAGGC  | LARP1B  | 554 | NM_018078    | chr4:129042980-129100667 | + |
|                  | Reverse | AGGGGGATTTGTGCTATGCC  |         |     |              |                          |   |
| hsa_circ_0006355 | Forward | TGCTAATACCGTGATGCGCT  | TMLHE   | 763 | NM_018196    | chrX:154736558-154766779 | - |
|                  | Reverse | GACTGGCCCAATCCCAATCA  |         |     |              |                          |   |
| hsa_circ_0054618 | Forward | TAAGGCAGCGGTCCCAGATA  | CCDC88A | 525 | NM_001135597 | chr2:55559701-55562300   | - |
|                  | Reverse | TCAGGAGCTCCAAACCCTTC  |         |     |              |                          |   |
| hsa_circ_0082002 | Forward | CAGTCGGAGGTTCACTGCAT  | MET     | 595 | NM_001127500 | chr7:116339124-          | + |

|                  |         |                       |         |     |              |                           |   |
|------------------|---------|-----------------------|---------|-----|--------------|---------------------------|---|
|                  | Reverse | AATCTGGCTTGCTTTGTGCG  |         |     |              | 116340338                 |   |
| hsa_circ_0008585 | Forward | AGTGGCACACAGAGTTCTCG  | BIRC6   | 212 | NM_016252    | chr2:32832521-32836649    | + |
|                  | Reverse | GTCCTGCCTACCCGCTTATC  |         |     |              |                           |   |
| hsa_circ_0008366 | Forward | TAACCGAATGTTCCCGAGCC  | RIC8B   | 127 | NM_018157    | chr12:107219503-107254190 | + |
|                  | Reverse | AGGCGCACCAGCTTATTTCT  |         |     |              |                           |   |
| hsa_circ_0017160 | Forward | CTCCGAGGAATGGAAGCCA   | MTR     | 81  | NM_000254    | chr1:237013643-237016388  | + |
|                  | Reverse | CCCATGTCCATGCCAGACTT  |         |     |              |                           |   |
| hsa_circ_0067323 | Forward | TGAGGACCTGATCCTGGAG   | TMCC1   | 313 | NM_001017395 | chr3:129546645-129551669  | - |
|                  | Reverse | CTGGGTGGCACTCGAATCT   |         |     |              |                           |   |
| hsa_circ_0005406 | Forward | GGTCCTGGACAGTGTGGAAG  | PHACTR4 | 73  | NM_001048183 | chr1:28785595-28793046    | + |
|                  | Reverse | GCCAAAGCCTGAGAACTTGC  |         |     |              |                           |   |
| hsa_circ_0007518 | Forward | GTGGTGGTGTGCACATTGAG  | NDUFB2  | 76  | NM_004546    | chr7:140402665-140404763  | + |
|                  | Reverse | AACTCGCTCTGGAACACCTG  |         |     |              |                           |   |
| hsa_circ_0003639 | Forward | TTTACGAGGACTTGGAGCC   | ZC3H11A | 237 | NM_014827    | chr1:203786053-203787817  | + |
|                  | Reverse | CACACCTGTCGAAAACAGCG  |         |     |              |                           |   |
| hsa_circ_0032125 | Forward | CGGGATCAACATCCCACACA  | PRKCH   | 452 | NM_006255    | chr14:61909828-61924397   | + |
|                  | Reverse | TCACGTCCTTCTTCAGCACC  |         |     |              |                           |   |
| hsa_circ_0082415 | Forward | ACTTCTGGGCGTACAGTGTG  | MKLN1   | 536 | NM_001145354 | chr7:131113791-131130662  | + |
|                  | Reverse | TCGCTGGCCACCAAATACAT  |         |     |              |                           |   |
| hsa_circ_0027969 | Forward | CCAGTGTTTGTGCGGTTCTG  | SLC41A2 | 564 | NM_032148    | chr12:105255068-105322472 | - |
|                  | Reverse | TGCCATGATGCCACTGGATT  |         |     |              |                           |   |
| hsa_circ_0008006 | Forward | ATGTTGCCAGAGAGGCAGATG | RPRD1B  | 97  | NM_021215    | chr20:36668836-36694658   | + |
|                  | Reverse | TGTATGAACTCGCCGCCATA  |         |     |              |                           |   |
| hsa_circ_0078299 | Forward | GCTGGACAGGAAACGGAGAA  | AKAP12  | 102 | NM_005100    | chr6:151669845-151674887  | + |
|                  | Reverse | CACTGCGGTTGACTCTGACT  |         |     |              |                           |   |
| hsa_circ_0004670 | Forward | AAGGCTGGGTACATGACAGC  | BAZ1B   | 482 | NM_032408    | chr7:72873865-72884813    | - |
|                  | Reverse | TGAAATGACCCGGGCTTCAA  |         |     |              |                           |   |
| hsa_circ_0004960 | Forward | GCAGTGGAGACTCTTTGGA   | NUP98   | 71  | NM_016320    | chr11:3794861-3797251     | - |
|                  | Reverse | AAAGAGGGAGCCAGATGTGC  |         |     |              |                           |   |
| hsa_circ_0009069 | Forward | TCCAAATCTCGGCGAACCAA  | PHF8    | 140 | NM_015107    | chrX:54013510-54014377    | - |
|                  | Reverse | GTCGCCTTCTCCTTTCCCAA  |         |     |              |                           |   |
| hsa_circ_0075748 | Forward | GGCAGCAAGGAGTGAAAAC   | KIF13A  | 250 | NM_001105568 | chr6:17772138-17779330    | - |
|                  | Reverse | CTCTGGCCAACCCTTGTCAT  |         |     |              |                           |   |
| hsa_circ_0020522 | Forward | CAGCAGTAGCAAAGGGACCA  | PPP2R2D | 325 | NM_018461    | chr10:133753534-133761295 | + |
|                  | Reverse | ACCGTTCCAGCAACTCAA    |         |     |              |                           |   |
| hsa_circ_0007262 | Forward | AGGCAGTCAGTCGGAAGTG   | CHD2    | 123 | NM_001271    | chr15:93467550-93472321   | + |
|                  | Reverse | TTGGAACCTGCTGATTCGCT  |         |     |              |                           |   |
| hsa_circ_0006365 | Forward | ATGGGTTGGGAAGATACCGC  | TPST1   | 95  | NM_003596    | chr7:65751497-65751696    | + |
|                  | Reverse | GTGGGTTGGCATATGGGTCA  |         |     |              |                           |   |
| hsa_circ_0019607 | Forward | CAAGTTGCACACAGTGGAGC  | OGA     | 630 | NM_012215    | chr10:103552595-103570071 | - |
|                  | Reverse | TCGTGACCGCCATTCTTCAA  |         |     |              |                           |   |
| hsa_circ_0002220 | Forward | AGCCAGCTGCAAGGAATCAA  | MED13   | 365 | NM_005121    | chr17:60061531-60062451   | - |
|                  | Reverse | GGGGCAGATATTGGCTTGGT  |         |     |              |                           |   |
| hsa_circ_0006127 | Forward | TTTCTGTACCCTGCCCCAAC  | SRCAP   | 95  | NM_006662    | chr16:30740286-30740893   | + |
|                  | Reverse | GGGCAGCCTCGGTATAAGTC  |         |     |              |                           |   |

|                  |         |                      |         |     |              |                          |   |
|------------------|---------|----------------------|---------|-----|--------------|--------------------------|---|
| hsa_circ_0001376 | Forward | GCATGACATGGTGGCAACTC | ATP13A3 | 107 | NM_024524    | chr3:194169185-194175121 | - |
|                  | Reverse | CCATGACATCTCCTGGCACA |         |     |              |                          |   |
| hsa_circ_0067480 | Forward | CATGACAGGCAAGGGGAAGT | STAG1   | 254 | NM_005862    | chr3:136183722-136221621 | - |
|                  | Reverse | TGTGCCGAGTACACCAAGTG |         |     |              |                          |   |
| hsa_circ_0072697 | Forward | TCACCCATGTGGTATGCACC | PPWD1   | 485 | NM_015342    | chr5:64863339-64868113   | + |
|                  | Reverse | AGGAGGCCAGTCCAGTATT  |         |     |              |                          |   |
| hsa_circ_0084188 | Forward | CACTGCAGGTCAGAAGAGCA | SPIDR   | 183 | NM_001080394 | chr8:48192449-48206619   | + |
|                  | Reverse | TGGTGGTTTCTTGCTTGGGT |         |     |              |                          |   |
| hsa_circ_0003456 | Forward | TACATCACCCGCTACATCGC | PSMA7   | 118 | NM_002792    | chr20:60714130-60716000  | - |
|                  | Reverse | AGAGCCTAGGAGTGCCATCA |         |     |              |                          |   |
| hsa_circ_0000842 | Forward | TGGAAAATGCAGCCTCAGGT | RPRD1A  | 154 | NM_018170    | chr18:33606862-33613800  | - |
|                  | Reverse | GCCAGCAACATACACGCATC |         |     |              |                          |   |
| hsa_circ_0001979 | Forward | GACTGGACCATCACTGCACA | SIPA1L1 | 613 | NM_015556    | chr14:72054287-72056087  | + |
|                  | Reverse | GTCCATGCTGAGGCTTCCTT |         |     |              |                          |   |
| hsa_circ_0001771 | Forward | CGGTCTGGAGAAGAAGAGC  | RBM33   | 387 | NM_053043    | chr7:155457868-155473602 | + |
|                  | Reverse | TGTCAACTCAGCTTCGTGGC |         |     |              |                          |   |
| hsa_circ_0004276 | Forward | CTTGTGAATGGTCTGGGC   | SUCLG2  | 81  | NM_003848    | chr3:67546221-67559327   | - |
|                  | Reverse | TCCAAGAAGTTGGCTGGCTT |         |     |              |                          |   |
| hsa_circ_0014624 | Forward | CCAGGAAGGCTTGAGACAG  | GON4L   | 251 | NM_001037533 | chr1:155734790-155736500 | - |
|                  | Reverse | CAGTGCTGCAGGAGACTCAA |         |     |              |                          |   |
| hsa_circ_0004179 | Forward | GCCCTGTACACAGAAGCCAT | CLEC16A | 111 | NM_015226    | chr16:11063017-11076848  | + |
|                  | Reverse | GGCCTGGTTATCCACTGAGA |         |     |              |                          |   |
| hsa_circ_0077495 | Forward | GGCAGAGAGATGCAGACGTT | ASCC3   | 181 | NM_006828    | chr6:101246588-101253756 | - |
|                  | Reverse | AGTGGCATTGGTTCGCTGTA |         |     |              |                          |   |

<sup>a</sup>Bioinformatics result obtained by comparing the head and tail chromosomal positions with known transcripts. circRNA, circular RNA; chr, chromosome; -, negative strand; +, positive strand.

Table SII. Clinical information of patients with biliary atresia.

| No.         | Sex    | Surgery date | Age at surgery, days |
|-------------|--------|--------------|----------------------|
| 242         | Female | 2018/6/8     | 46                   |
| 243         | Female | 2018/6/8     | 44                   |
| 250         | Male   | 2018/6/15    | 108                  |
| D1916000091 | Female | 2018/3/30    | 99                   |
| D1916000231 | Female | 2018/4/20    | 100                  |
| D1916000471 | Female | 2018/7/25    | 65                   |
| D1916000601 | Male   | 2018/8/3     | 86                   |
| D1916000641 | Male   | 2018/9/11    | 55                   |
| D1916000951 | Female | 2018/12/26   | 65                   |
| D1916000981 | Male   | 2019/1/9     | 148                  |
| D1916001301 | Female | 2019/5/17    | 48                   |
| D1916001361 | Male   | 2019/6/19    | 48                   |
| D1916001391 | Male   | 2019/7/3     | 108                  |
| D1916001641 | Male   | 2019/10/9    | 38                   |
| D1916001691 | Male   | 2019/10/30   | 54                   |
| D1916001701 | Male   | 2019/11/4    | 120                  |
| D1916001781 | Female | 2019/11/15   | 77                   |
| D1916001821 | Female | 2019/11/27   | 42                   |
| D1916001901 | Male   | 2019/11/29   | 67                   |
| D1916001911 | Male   | 2019/12/17   | 137                  |
| D1916001961 | Female | 2020/2/17    | 97                   |
| D1916001991 | Female | 2019/12/27   | 96                   |
| D1916002001 | Female | 2019/12/31   | 62                   |
| D1916002011 | Female | 2019/12/31   | 62                   |
| D1916002031 | Male   | 2020/2/6     | 70                   |
| D1916002041 | Male   | 2020/2/6     | 70                   |
| D1916002081 | Female | 2020/3/23    | 85                   |
| D1916002091 | Female | 2020/3/24    | 79                   |
| D1916002111 | Male   | 2020/3/20    | 82                   |
| D1916002131 | Male   | 2020/3/9     | 54                   |
| D1916002151 | Female | 2020/3/6     | 57                   |
| D1916002161 | Female | 2020/4/13    | 37                   |
| D1916002181 | Female | 2020/4/10    | 45                   |
| D1916002201 | Female | 2020/4/14    | 80                   |
| D1916002261 | Female | 2020/4/22    | 50                   |
| D1916002271 | Female | 2020/4/27    | 45                   |
| D1916002331 | Female | 2020/5/14    | 66                   |
| D1916002341 | Female | 2020/5/14    | 66                   |
| Mean        |        |              | 72.58                |
| SD value    |        |              | 27.31                |

Table SIII. Clinical information of choledochal cyst patients.

| No.         | Sex    | Surgery date | Age at surgery, days |
|-------------|--------|--------------|----------------------|
| D1916000111 | Female | 2018/4/2     | 2323                 |
| D1916000141 | Female | 2018/4/9     | 604                  |
| D1916000171 | Male   | 2018/4/18    | 98                   |
| D1916000181 | Female | 2018/4/18    | 1456                 |
| D1916000201 | Female | 2018/4/20    | 159                  |
| D1916000211 | Male   | 2018/4/23    | 63                   |
| D1916000221 | Female | 2018/4/24    | 2721                 |
| D1916000241 | Female | 2018/4/25    | 1306                 |
| D1916000251 | Female | 2018/4/27    | 3570                 |
| D1916000261 | Female | 2018/3/2     | 209                  |
| D1916000271 | Male   | 2018/5/2     | 4091                 |
| D1916000301 | Female | 2018/5/31    | 2105                 |
| D1916000311 | Male   | 2018/5/17    | 131                  |
| D1916000321 | Male   | 2018/5/23    | 122                  |
| D1916000371 | Female | 2018/5/31    | 2105                 |
| D1916000391 | Female | 2018/6/4     | 1329                 |
| D1916000401 | Male   | 2018/6/11    | 1191                 |
| D1916000411 | Female | 2018/6/14    | 1794                 |
| D1916000421 | Male   | 2018/6/15    | 590                  |
| D1916000441 | Female | 2018/7/4     | 1950                 |
| D1916000491 | Male   | 2018/8/1     | 47                   |
| D1916000501 | Female | 2018/8/27    | 471                  |
| D1916000621 | Female | 2018/9/7     | 2842                 |
| D1916000691 | Female | 2018/9/29    | 31                   |
| D1916000701 | Female | 2018/9/30    | 995                  |
| D1916000721 | Female | 2018/10/10   | 1458                 |
| D1916000731 | Female | 2018/10/11   | 1435                 |
| D1916000741 | Female | 2018/10/17   | 1077                 |
| D1916000751 | Female | 2018/10/18   | 862                  |
| D1916000761 | Male   | 2018/10/22   | 186                  |
| D1916000781 | Female | 2018/10/31   | 65                   |
| D1916000791 | Female | 2018/11/1    | 4337                 |
| D1916000801 | Female | 2018/10/15   | 1319                 |
| D1916000811 | Male   | 2018/11/7    | 63                   |
| D1916000821 | Female | 2018/11/8    | 229                  |
| D1916000831 | Female | 2018/11/14   | 786                  |
| D1916000871 | Female | 2018/11/26   | 1407                 |
| D1916000881 | Female | 2018/11/28   | 1852                 |
| Mean        |        |              | 1209.70              |
| SD value    |        |              | 1158.49              |
